# Supplementary material for: Fluorescent organic nanoparticles with enhanced fluorescence by self-aggregation and their application for detection of Fe3+ ions
Source: Royal Society of Chemistry journal article supplement (doi:10.1039/c7nj04343k), 2018-01-01
Supplement: c7nj04343k1.pdf [file c7nj04343k1.pdf]

New Journal of Chemistry  
Electronic supplementary information (ESI)

Fluorescent organic nanoparticles with enhanced fluorescence by self-  
aggregation and their application for detection Fe<sup>3+</sup> ions

Reza Azadbakht\*, Mohammad Hakimi, Javad Khanabadi

Department of Chemistry, Payame Noor University (PNU), Iran

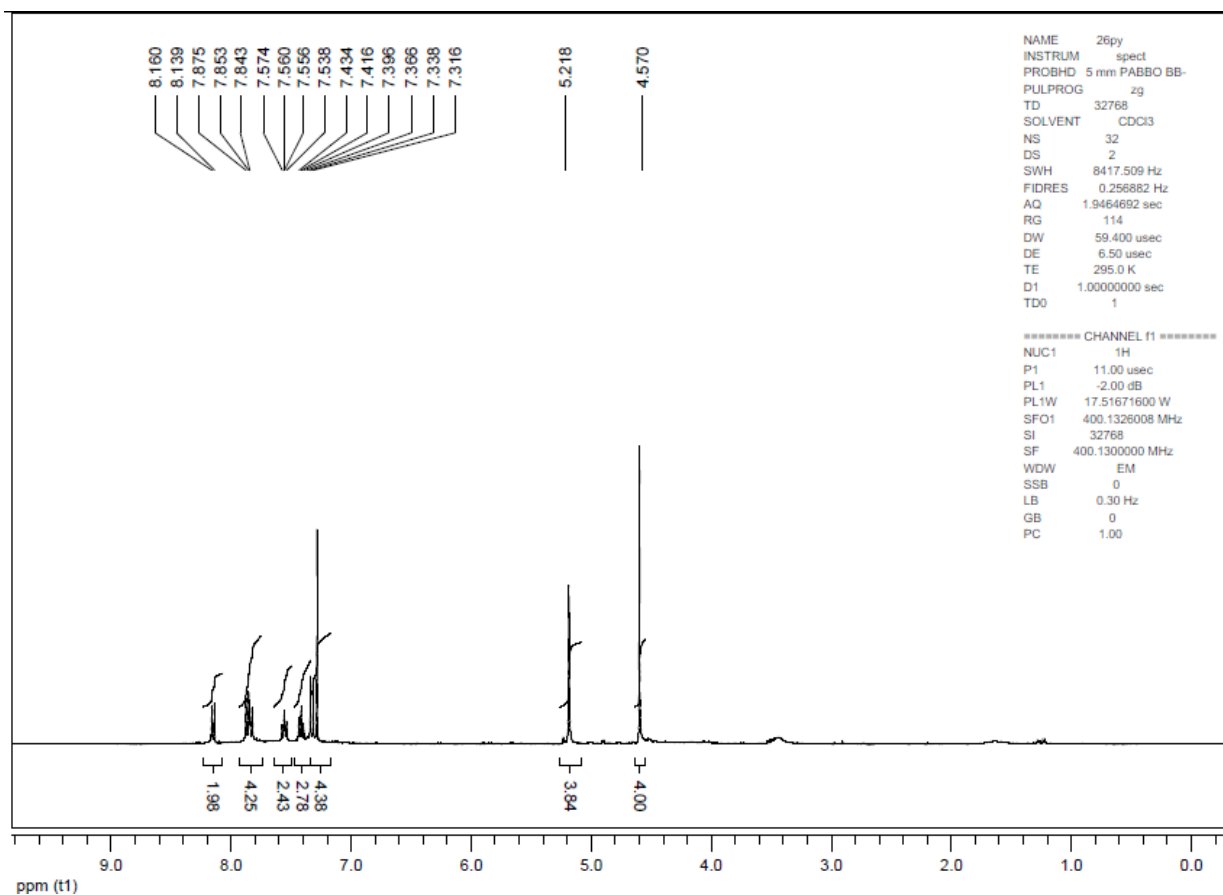

S1. <sup>1</sup>H NMR spectrum of L

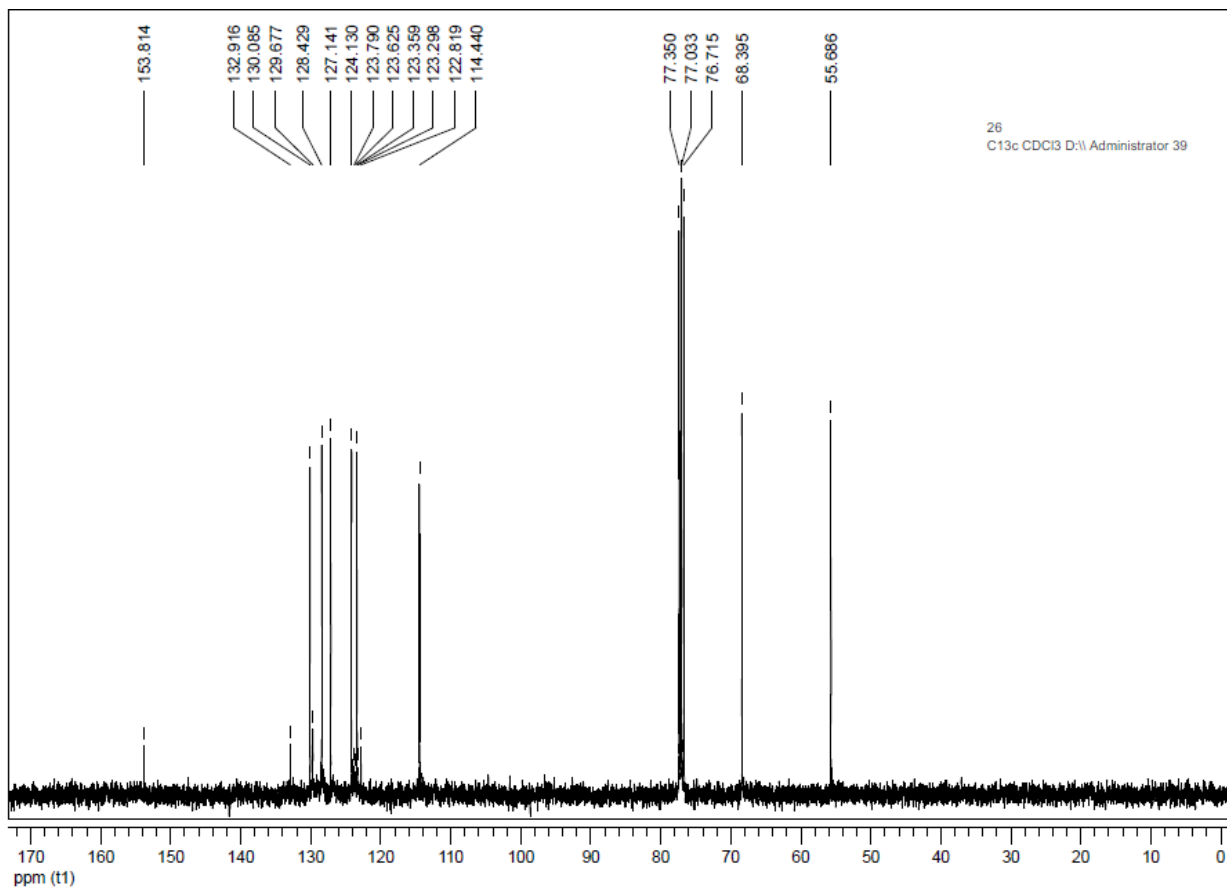

S2.  $^{13}\text{C}$ NMR spectrum of L

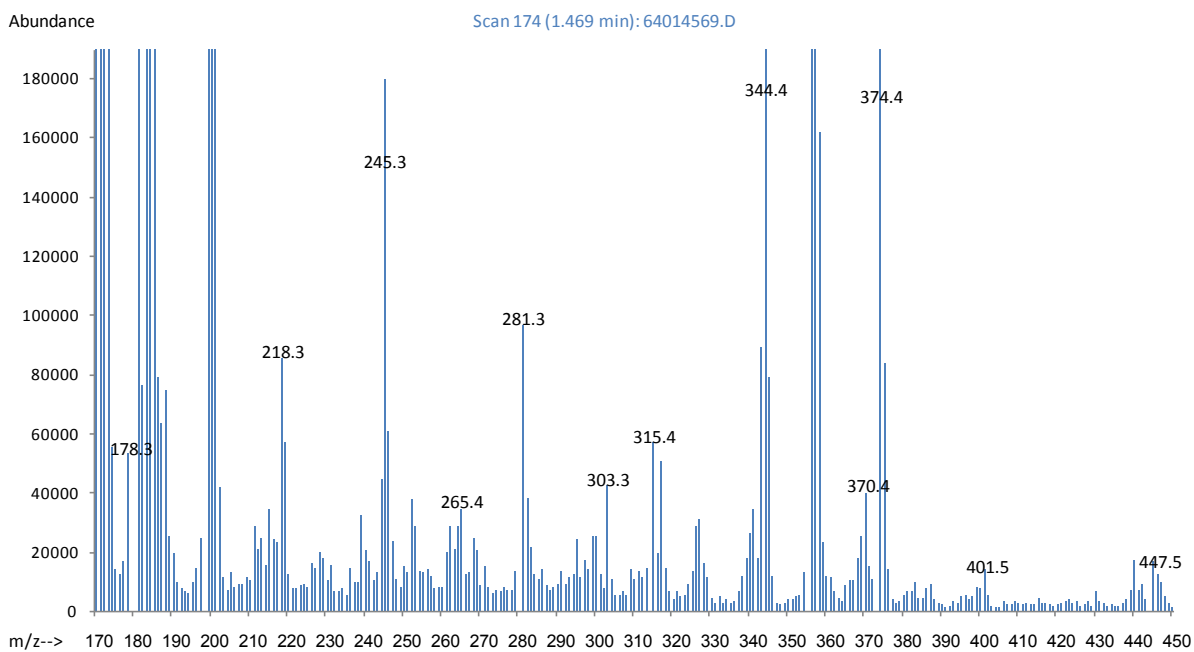

**S3.** Mass spectrum of L

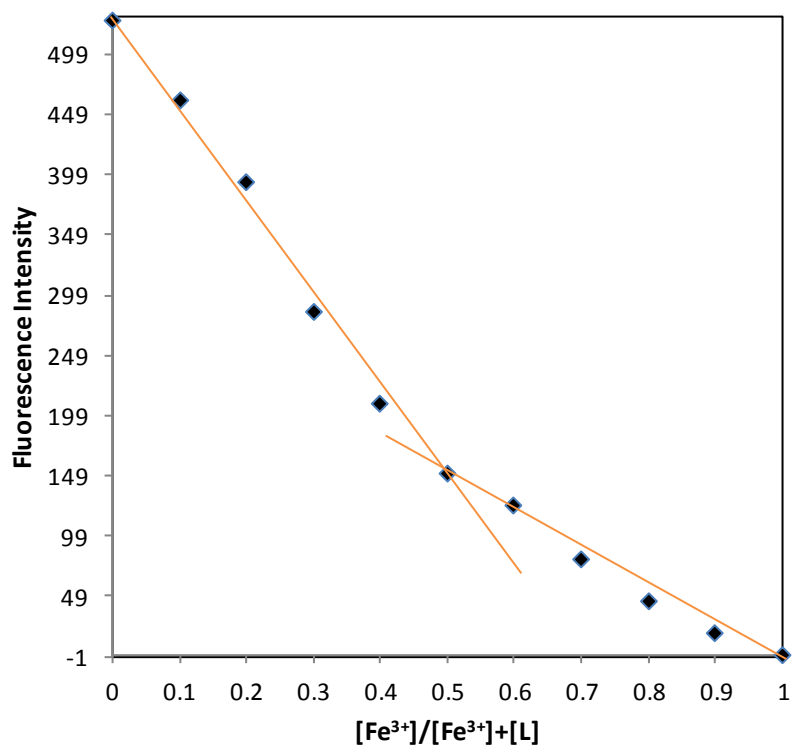

**S4.** Job's plot of L and Fe<sup>3+</sup>, which indicated that the stoichiometry of the Fe<sup>3+</sup> - L complex is 1:1.

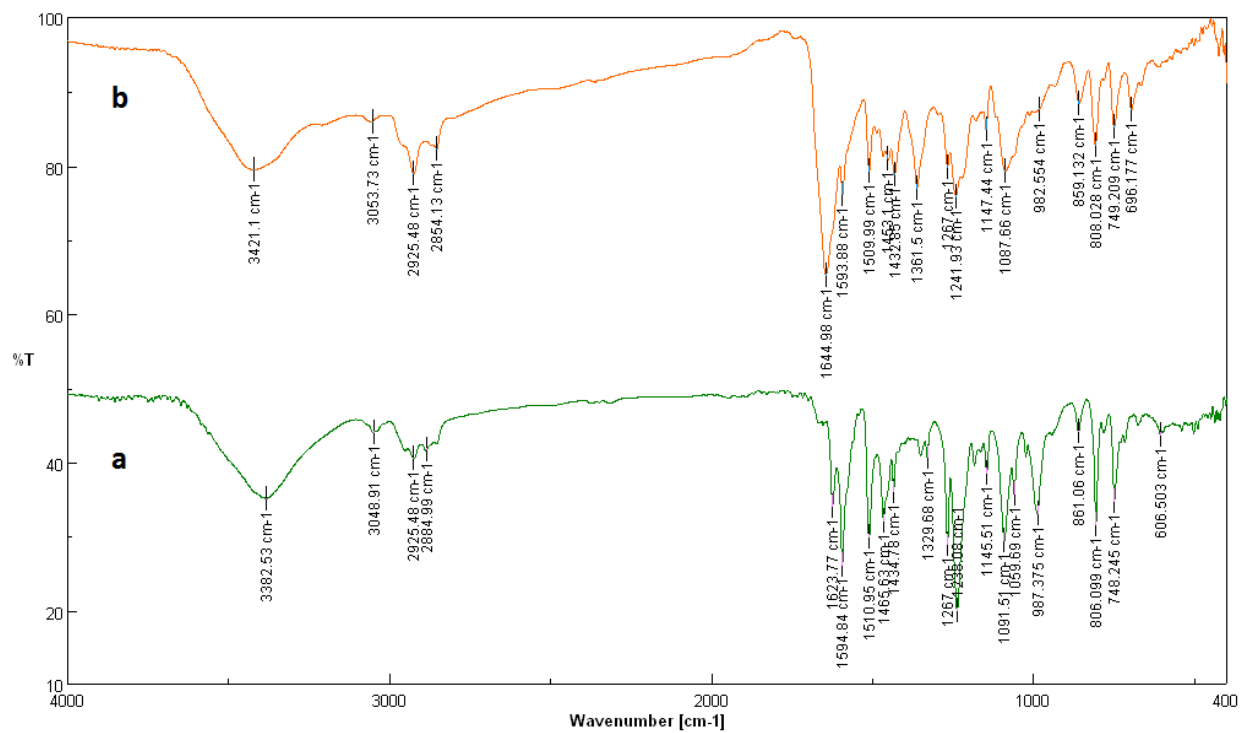

S5. IR spectra of (a) L, (b) L-Fe<sup>3+</sup> complex.
